# Supplementary material for: Inhibition of BIRC2 Sensitizes α7-HPV-Related Cervical Squamous Cell Carcinoma to Chemotherapy
Source: MDPI journal article supplement (doi:10.3390/ijms222011020), 2021-10-13
Supplement: s1 [file s1]

**Supplementary Materials:**

**(A)**

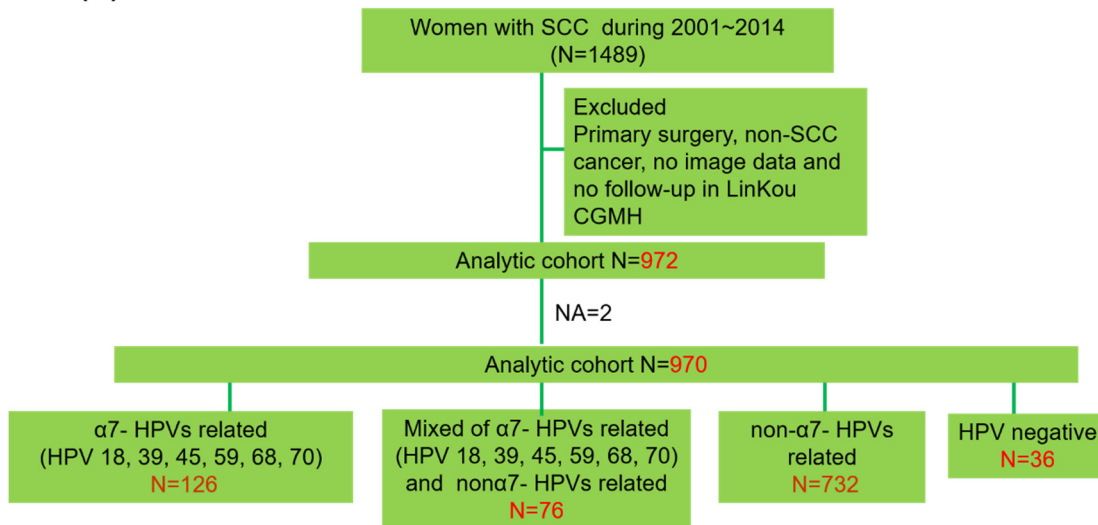

**(B)**

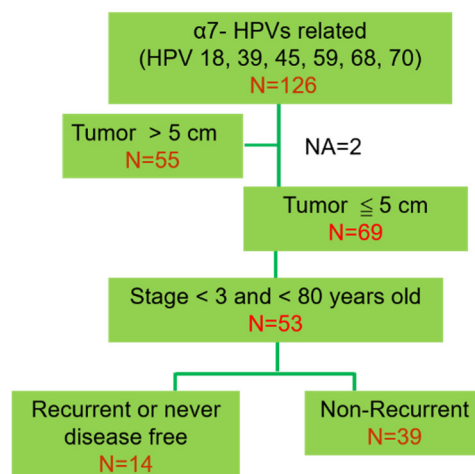

**Supplementary Figure S1. A&B:** Study flowchart.

A

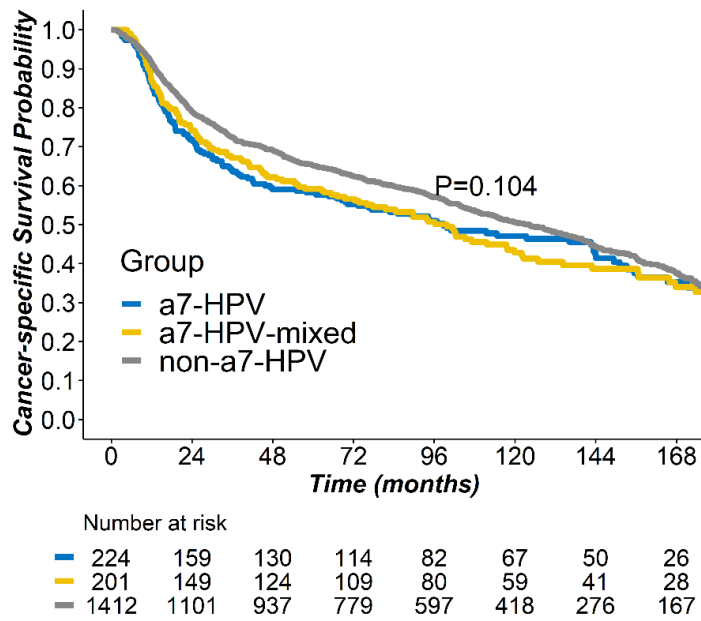

B

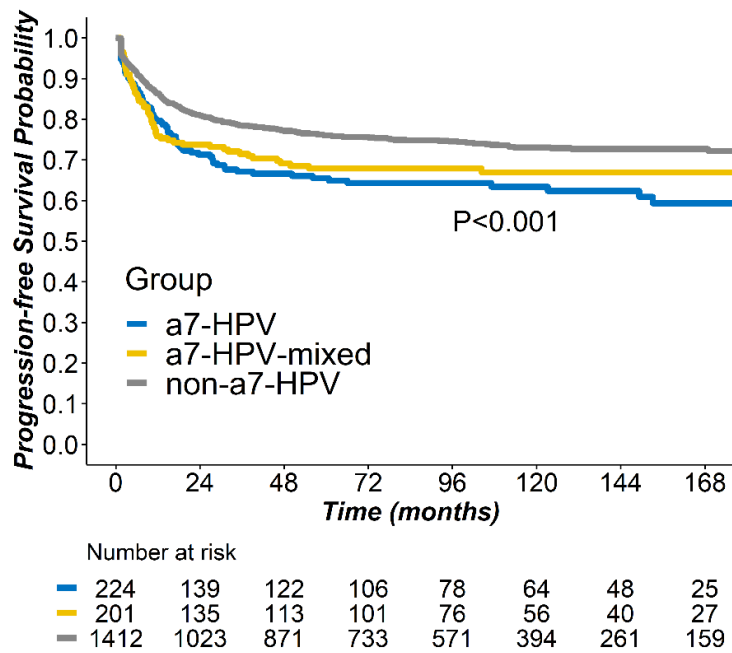

**Supplementary Figure S2.** Kaplan–Meier survival curves presenting (A) CSS and (B) PFS according to HPV genotype ( $\alpha$ 7-HPV,  $\alpha$ 7 HPV-mixed, or non- $\alpha$ 7-HPV) in the 1993–2014 cohort.

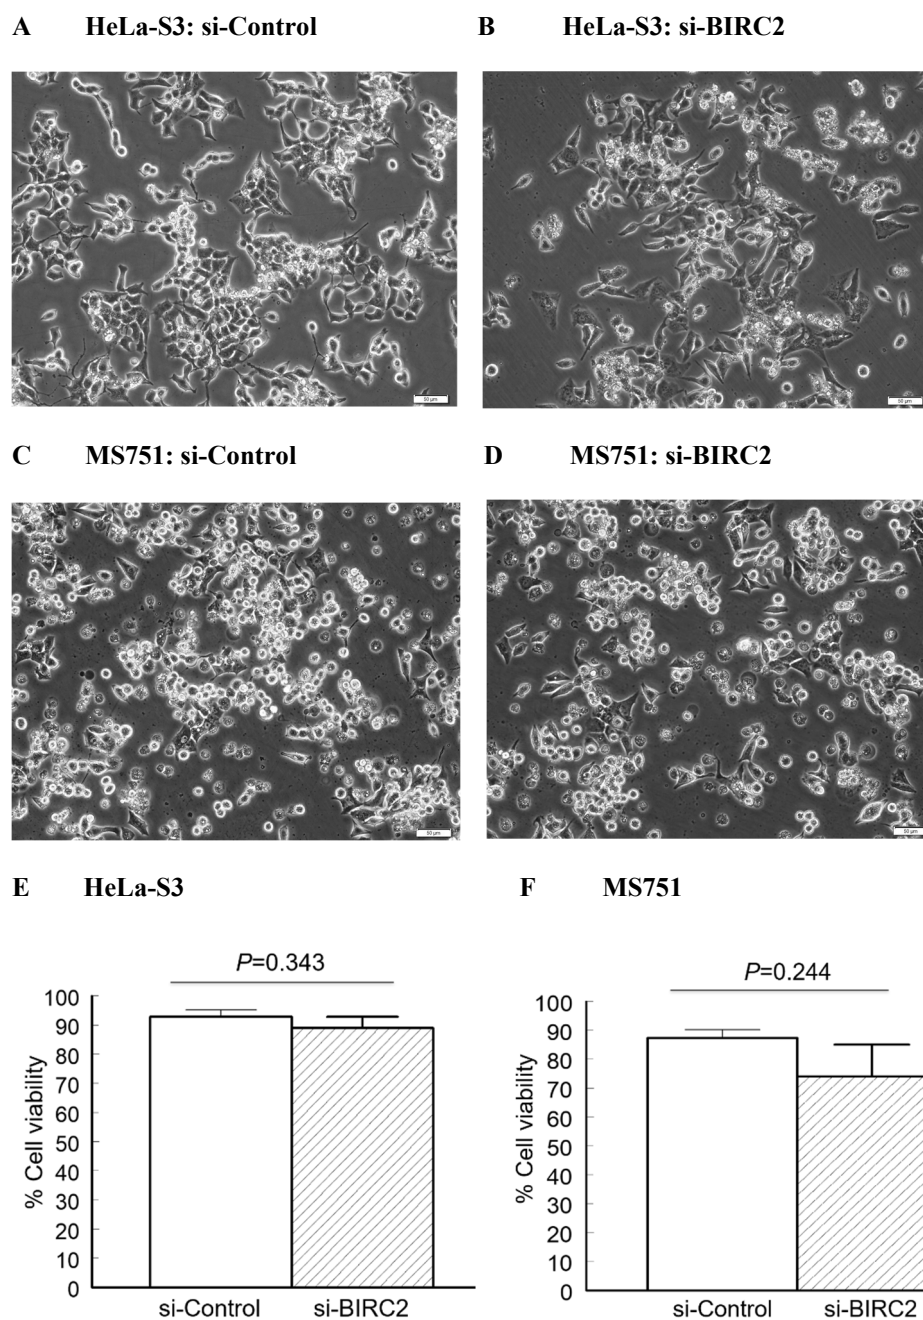

**Supplementary Figure S3.** Effects on cervical cancer cell morphology and cell viability after siRNA for control (si-Control) or BIRC2 (si-BIRC2) treatment. (A~D) Representative cell morphology images of HeLa-S3 or MS751 cells were subjected to control or BIRC2 silencing using a specific siRNA for 72 h. Scale bar, 50µm. (E, F) HeLa-S3 or MS751 cells were treated with si-Control or si-BIRC2 for 72 h. Cell viability quantitatively analyzed by the trypan blue assay. The viability of the cells after transfection with si-Control or si-BIRC2 was 93 % and 89 % for HeLa-S3, and 87 % and 74 % for MS751, respectively. In the quantitative bar graph, the results are expressed as mean  $\pm$  standard error of the mean.

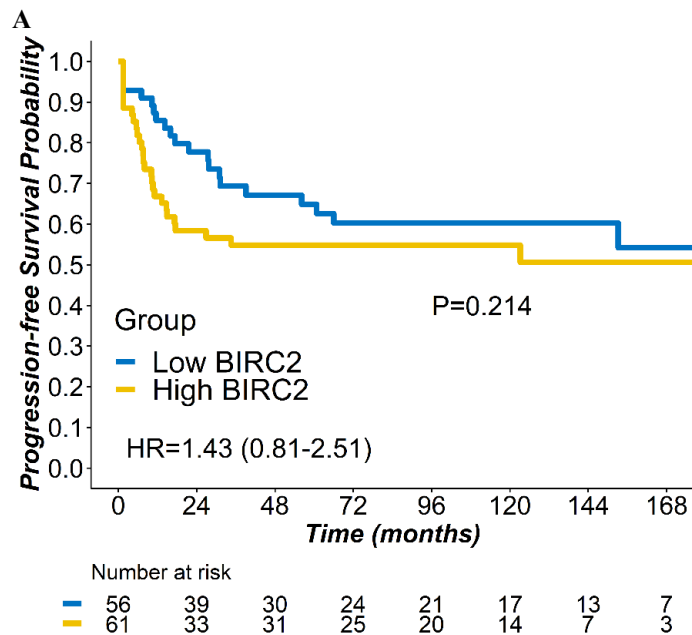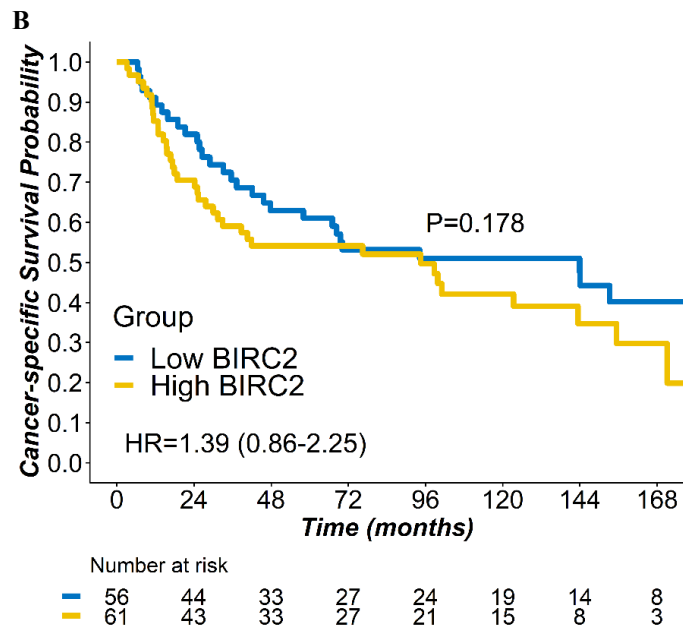

**Supplementary Figure S4.** Kaplan–Meier survival curves of **(A)** CSS and **(B)** PFS of  $\alpha 7$ -HPV related SCC in the 2001–2014 cohort according to BIRC2 histoscores ( $>175$  vs.  $\leq 175$ ).

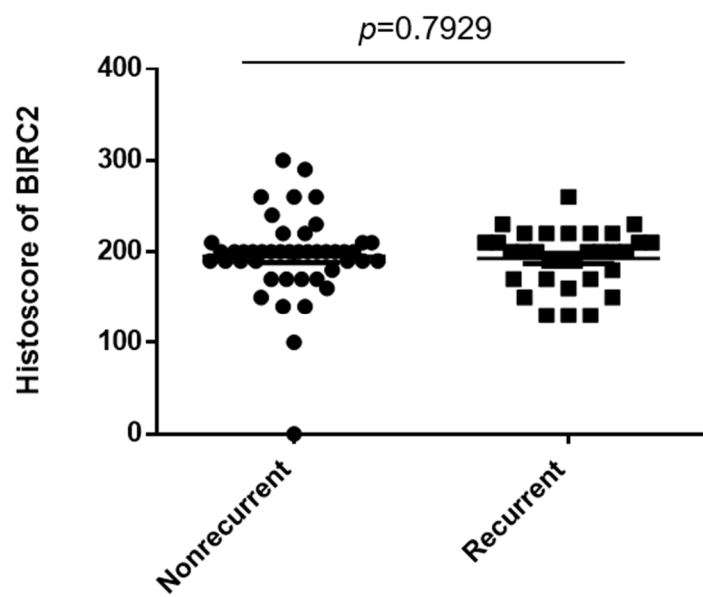

**Supplementary Figure S5.** BIRC2 histoscores in matched non- $\alpha$ 7-HPV-related cervical SCC according to recurrence/progression status.
